# Supplementary material
Source: PubMed Central journal article supplement (PMC7965898)
Supplement: 2356_tables.pdf [file 2356_tables.pdf]

**On-line Table 1: Clinical features of the 20 patients with ALS**

| Patients | Sex | Age (yr) | Time from Onset to MRI (mo) | ALSFRS-R | MRC Upper Limbs | MRC Lower Limbs | Clinical Form |
|----------|-----|----------|-----------------------------|----------|-----------------|-----------------|---------------|
| 1        | F   | 61       | 16                          | 41/48    | 76/80           | 67/70           | Bulbar        |
| 2        | F   | 57       | 12                          | 33/48    | 55/80           | 46/70           | Spinal        |
| 3        | F   | 53       | 4                           | 42/48    | 76/80           | 64/70           | Spinal        |
| 4        | M   | 74       | 14                          | 46/48    | 71/80           | 70/70           | Flail arm     |
| 5        | F   | 56       | 15                          | 43/48    | 80/80           | 50/70           | Spinal        |
| 6        | M   | 71       | 30                          | 35/48    | 46/80           | 63/70           | Flail arm     |
| 7        | M   | 66       | 14                          | 38/48    | 74/80           | 70/70           | Bulbar        |
| 8        | M   | 59       | 38                          | 35/48    | 69/80           | 42/70           | Flail leg     |
| 9        | M   | 66       | 14                          | 37/48    | 64/80           | 70/70           | Bulbar        |
| 10       | M   | 55       | 5                           | 46/48    | 80/80           | 57/70           | Spinal        |
| 11       | F   | 49       | 12                          | 39/48    | 72/80           | 60/70           | Spinal        |
| 12       | M   | 66       | 16                          | 42/48    | 66/80           | 55/70           | Spinal        |
| 13       | M   | 38       | 26                          | 34/48    | 45/80           | 59/70           | Flail arm     |
| 14       | M   | 53       | 17                          | 41/48    | 75/80           | 59/70           | Spinal        |
| 15       | M   | 63       | 67                          | 28/48    | 42/80           | 28/70           | Spinal        |
| 16       | M   | 49       | 62                          | 30/48    | 52/80           | 56/70           | Spinal        |
| 17       | F   | 46       | 6                           | 43/48    | 68/80           | 63/70           | Spinal        |
| 18       | M   | 52       | 4                           | 41/48    | 75/80           | 62/70           | Spinal        |
| 19       | M   | 63       | 8                           | 46/48    | 68/80           | 70/70           | Spinal        |
| 20       | M   | 62       | 22                          | 24/48    | 45/80           | 28/70           | Spinal        |

<sup>a</sup> Familial form of ALS.<sup>b</sup> D90A *SOD1* mutation.

**On-line Table 2: Significant changes of MTR in 48 × 2 regions of interest<sup>a</sup>**

|                                          | Left               |                   |                    |                   | Right              |                   |                    |                   |
|------------------------------------------|--------------------|-------------------|--------------------|-------------------|--------------------|-------------------|--------------------|-------------------|
|                                          | Controls           |                   | Patients           |                   | Controls           |                   | Patients           |                   |
|                                          | Mean               | SD                | Mean               | SD                | Mean               | SD                | Mean               | SD                |
| Angular gyrus                            | 17.96              | 1.24              | 18.12              | 2.38              | 18.36              | 1.53              | 18.02              | 1.66              |
| Central opercular cortex                 | 19.02              | 2.33              | 21.78              | 2.96              | 19.63              | 2.01              | 21.57              | 2.81              |
| Cingulate gyrus AD                       | 21.37              | 3.36              | 20.50              | 2.67              | 19.87              | 2.33              | 19.58              | 1.89              |
| Cingulate gyrus PD                       | 21.29              | 2.12              | 20.62              | 1.73              | 20.96              | 1.90              | 21.00              | 1.05              |
| Cuneal cortex                            | 17.88              | 2.62              | 17.07              | 2.22              | 18.79              | 2.19              | 18.41              | 1.60              |
| Frontal medial cortex                    | 24.32              | 2.62              | 24.80              | 3.04              | 22.28              | 1.81              | 23.04              | 1.81              |
| Frontal operculum cortex                 | 18.87              | 2.48              | 21.05              | 3.77              | 20.02              | 2.62              | 20.99              | 2.11              |
| Frontal orbital cortex                   | 22.53              | 1.53              | 22.76              | 1.82              | 24.18              | 1.74              | 24.46              | 1.88              |
| Frontal pole                             | 19.49 <sup>b</sup> | 1.78 <sup>b</sup> | 18.54 <sup>b</sup> | 1.26 <sup>b</sup> | 19.06              | 1.98              | 18.34              | 1.40              |
| Heschl gyrus                             | 20.81              | 3.21              | 20.12              | 2.55              | 20.36              | 3.55              | 18.63              | 3.15              |
| Inferior frontal                         | 20.70              | 2.82              | 19.55              | 2.43              | 20.50              | 2.75              | 19.45              | 2.60              |
| Inferior frontal gyrus pars triangularis | 20.03              | 2.63              | 19.46              | 2.01              | 20.63              | 2.49              | 20.90              | 3.47              |
| Inferior temporal gyrus AD               | 22.04              | 2.23              | 23.87              | 6.69              | 22.18              | 1.55              | 23.00              | 3.45              |
| Inferior temporal gyrus PD               | 22.32              | 2.74              | 25.05              | 4.34              | 22.66              | 2.43              | 25.65              | 4.59              |
| Inferior temporal gyrus Tmp Occ Part     | 20.25              | 1.71              | 21.87              | 2.04              | 21.91              | 2.01              | 22.95              | 1.60              |
| Middle frontal gyrus                     | 20.01 <sup>b</sup> | 2.70 <sup>b</sup> | 18.53 <sup>b</sup> | 1.52 <sup>b</sup> | 20.13              | 3.05              | 18.77              | 1.87              |
| Paracingulate gyrus                      | 20.27              | 2.14              | 20.57              | 3.25              | 18.72              | 2.40              | 18.87              | 1.87              |
| Parietal operculum cortex                | 18.41              | 1.83              | 19.94              | 3.61              | 19.13              | 1.63              | 19.89              | 2.87              |
| Planum polare                            | 24.21 <sup>b</sup> | 6.49 <sup>b</sup> | 21.40 <sup>b</sup> | 3.76 <sup>b</sup> | 21.79 <sup>b</sup> | 5.29 <sup>b</sup> | 18.63 <sup>b</sup> | 4.76 <sup>b</sup> |
| Postcentral gyrus                        | 19.63              | 2.21              | 18.76              | 2.42              | 19.57              | 2.41              | 18.49              | 1.62              |
| Precentral gyrus                         | 19.98 <sup>b</sup> | 1.89 <sup>b</sup> | 19.09 <sup>b</sup> | 1.45 <sup>b</sup> | 19.87 <sup>b</sup> | 1.20 <sup>b</sup> | 19.66 <sup>b</sup> | 1.50              |
| Precuneus cortex                         | 20.29              | 1.72              | 19.50              | 1.85              | 19.95 <sup>b</sup> | 2.37 <sup>b</sup> | 18.82 <sup>b</sup> | 1.53 <sup>b</sup> |
| Superior frontal gyrus                   | 20.84 <sup>b</sup> | 3.35 <sup>b</sup> | 19.16 <sup>b</sup> | 1.20 <sup>b</sup> | 20.37 <sup>b</sup> | 3.31 <sup>b</sup> | 18.77 <sup>b</sup> | 1.42 <sup>b</sup> |
| Superior parietal lobule                 | 19.15 <sup>b</sup> | 2.15 <sup>b</sup> | 18.21 <sup>b</sup> | 2.04 <sup>b</sup> | 19.15              | 2.21              | 18.33              | 2.13              |
| Supplementary motor cortex               | 21.44              | 3.34              | 21.02              | 2.75              | 19.75              | 2.69              | 20.09              | 2.30              |
| Supramarginal gyrus AD                   | 19.10              | 2.44              | 18.23              | 1.73              | 19.36              | 2.48              | 18.16              | 1.63              |
| Supramarginal gyrus PD                   | 18.31              | 1.55              | 18.49              | 3.05              | 18.78              | 1.84              | 18.46              | 1.62              |
| Insular cortex                           | 22.16              | 2.04              | 21.93              | 1.99              | 23.02              | 1.95              | 23.05              | 2.82              |
| Intracalcarine cortex                    | 19.19              | 1.55              | 18.70              | 1.61              | 20.14              | 1.74              | 20.05              | 1.47              |
| Lateral occipital cortex ID              | 17.97              | 1.58              | 19.31              | 4.08              | 18.25              | 1.11              | 19.19              | 3.59              |
| Lateral occipital cortex SD              | 18.11              | 1.57              | 18.14              | 4.11              | 18.47              | 1.80              | 18.38              | 3.23              |
| Lingual gyrus                            | 21.62              | 1.86              | 21.90              | 2.29              | 22.39              | 2.10              | 23.04              | 2.09              |
| Middle temporal gyrus AD                 | 20.10              | 1.93              | 20.53              | 2.16              | 19.06              | 1.81              | 19.65              | 3.56              |
| Middle temporal gyrus PD                 | 19.45              | 2.01              | 20.37              | 2.30              | 19.23              | 1.63              | 19.97              | 2.08              |
| Middle temporal gyrus Tmp Occ Part       | 18.60              | 1.22              | 19.07              | 2.79              | 18.86              | 1.50              | 19.65              | 2.37              |
| Occipital fusiform gyrus                 | 19.86              | 1.63              | 20.39              | 1.49              | 20.42              | 2.04              | 21.26              | 1.69              |
| Occipital pole                           | 15.50              | 1.81              | 17.56              | 7.11              | 15.36              | 1.73              | 17.00              | 6.56              |
| Parahippocampal gyrus AD                 | 25.95              | 2.75              | 26.67              | 2.54              | 26.30              | 2.31              | 26.39              | 2.85              |
| Parahippocampal gyrus PD                 | 22.74              | 1.76              | 23.57              | 2.53              | 23.78              | 1.90              | 23.51              | 3.12              |
| Planum temporale                         | 20.84 <sup>b</sup> | 4.86 <sup>b</sup> | 18.80 <sup>b</sup> | 3.40 <sup>b</sup> | 19.72 <sup>b</sup> | 4.39 <sup>b</sup> | 17.5 <sup>b</sup>  | 3.29 <sup>b</sup> |
| Subcallosal cortex                       | 26.00              | 2.37              | 27.23              | 2.80              | 25.49              | 2.79              | 26.90              | 2.08              |
| Superior temporal gyrus AD               | 19.38              | 2.71              | 19.99              | 2.80              | 19.11              | 1.79              | 20.28              | 3.24              |
| Superior temporal gyrus PD               | 18.14              | 1.62              | 19.58              | 1.76              | 18.27              | 1.30              | 19.17              | 2.71              |
| Supracalcarine cortex                    | 20.19 <sup>b</sup> | 2.79 <sup>b</sup> | 17.89 <sup>b</sup> | 3.72 <sup>b</sup> | 20.25              | 1.91              | 20.03              | 1.95              |
| Temporal fusiform cortex AD              | 25.24              | 2.15              | 25.98              | 5.96              | 25.99              | 2.70              | 25.57              | 2.40              |
| Temporal fusiform cortex PD              | 23.27              | 2.29              | 24.51              | 1.84              | 24.55              | 2.46              | 25.29              | 2.63              |
| Temporal occipital fusiform cortex       | 21.85              | 2.04              | 22.57              | 1.63              | 22.52              | 1.83              | 23.07              | 2.09              |
| Temporal pole                            | 22.92              | 1.98              | 22.42              | 1.71              | 22.35              | 1.64              | 21.75              | 1.88              |

<sup>a</sup> MTR in 48 × 2 regions of interest derived from the Harvard-Oxford atlas in controls and patients.<sup>b</sup> Regions of interest with significantly reduced MTR values in patients with ALS with respect to age-matched healthy controls ( $P < .05$ ).
